# Supplementary material for: From BTO2− to HBTO− insensitive energetic salt: a route to boost energy
Source: Royal Society of Chemistry journal article supplement (doi:10.1039/c9ce00690g), 2019-01-01
Supplement: c9ce00690g1.pdf [file c9ce00690g1.pdf]

## Electronic Supplementary Information

### **From BTO<sup>2-</sup> to HBTO<sup>-</sup> insensitive energetic salt: Route to boost energy**

Yuangang Xu,<sup>a</sup> Dongxue Li,<sup>b</sup> Qiuhan Lin,<sup>a</sup> Pengcheng Wang<sup>a</sup> and Ming Lu<sup>\*a</sup>

<sup>a</sup> School of Chemical Engineering, Nanjing University of Science and Technology,  
Nanjing 210094, Jiangsu, China.

<sup>b</sup> China National Quality Supervision Testing Center for Industrial Explosive Materials,  
Xiaolingwei 200, Nanjing 210094, Jiangsu, China.

E-mail: *luming@njust.edu.cn*

## Table of Contents

|                                                                             |    |
|-----------------------------------------------------------------------------|----|
| 1. Single-crystal X-ray diffraction analysis of <b>3</b> ·2H <sub>2</sub> O | S3 |
| 2. Single-crystal X-ray diffraction analysis of <b>4</b>                    | S5 |
| 3. Calculation of heats of formation                                        | S8 |
| References                                                                  | S8 |

# 1. Single-crystal X-ray diffraction analysis of $3 \cdot 2\text{H}_2\text{O}$

Table S1. Crystal data and structure refinement for  $3 \cdot 2\text{H}_2\text{O}$

|                                                 | $3 \cdot 2\text{H}_2\text{O}$                                 |
|-------------------------------------------------|---------------------------------------------------------------|
| CCDC                                            | 1903600                                                       |
| Empirical formula                               | $\text{C}_6\text{H}_{14}\text{N}_{18}\text{O}_4$              |
| Formula weight                                  | 402.35                                                        |
| Temperature / K                                 | 205                                                           |
| Crystal system                                  | monoclinic                                                    |
| Space group                                     | $P2_1/c$                                                      |
| $a / \text{\AA}$                                | 8.9135(17)                                                    |
| $b / \text{\AA}$                                | 14.392(3)                                                     |
| $c / \text{\AA}$                                | 6.7544(14)                                                    |
| $\alpha / ^\circ$                               | 90.00                                                         |
| $\beta / ^\circ$                                | 110.499(4)                                                    |
| $\gamma / ^\circ$                               | 90.00                                                         |
| Volume / $\text{\AA}^3$                         | 811.6(3)                                                      |
| $Z$                                             | 2                                                             |
| $\rho_{\text{calc}} / \text{g cm}^{-3}$         | 1.646                                                         |
| $\mu / \text{mm}^{-1}$                          | 0.138                                                         |
| $F(000)$                                        | 416.0                                                         |
| Crystal size / $\text{mm}^3$                    | 0.25×0.12×0.05                                                |
| Radiation                                       | $\text{MoK}\alpha$ ( $\lambda = 0.71073$ )                    |
| $2\theta$ range for data collection/ $^\circ$   | 4.878 to 55.272                                               |
| Index ranges                                    | $-11 \leq h \leq 9, -18 \leq k \leq 18, -7 \leq l \leq 8$     |
| Reflections collected                           | 6965                                                          |
| Independent reflections                         | 1869 [ $R_{\text{int}} = 0.0535, R_{\text{sigma}} = 0.0552$ ] |
| Data / restraints / parameters                  | 1869 / 0 / 131                                                |
| Goodness-of-fit on $F^2$                        | 1.030                                                         |
| Final $R$ indexes [ $I \geq 2\sigma(I)$ ]       | $R_1 = 0.0556, wR_2 = 0.1599$                                 |
| Final $R$ indexes [all data]                    | $R_1 = 0.0779, wR_2 = 0.1751$                                 |
| Largest diff. peak / hole / $\text{e \AA}^{-3}$ | 0.62 / -0.66                                                  |

Table S2. Selected bond lengths for  $3 \cdot 2\text{H}_2\text{O}$

| parameter | bond length ( $\text{\AA}$ ) | parameter          | bond length ( $\text{\AA}$ ) |
|-----------|------------------------------|--------------------|------------------------------|
| O1 N6     | 1.315(2)                     | N5 C1              | 1.320(3)                     |
| O2 H2A    | 0.8501                       | N9 N8              | 1.347(3)                     |
| O2 H2B    | 0.8501                       | N9 C3              | 1.337(3)                     |
| N2 N1     | 1.403(3)                     | N3 C2              | 1.293(3)                     |
| N2 C2     | 1.386(3)                     | N6 N7              | 1.343(3)                     |
| N2 C1     | 1.358(3)                     | N6 C3              | 1.350(3)                     |
| N4 H4     | 0.87                         | N1 H1A             | 0.8633                       |
| N4 N3     | 1.384(3)                     | N1 H1B             | 0.8629                       |
| N4 C1     | 1.327(3)                     | N7 N8              | 1.316(3)                     |
| N5 H5A    | 0.87                         | C2 C2 <sup>1</sup> | 1.453(4)                     |
| N5 H5B    | 0.87                         | C3 C3 <sup>2</sup> | 1.428(5)                     |

<sup>1</sup>-X,1-Y,-Z; <sup>2</sup>1-X,1-Y,1-Z

Table S3. Selected bond angles for 3·2H<sub>2</sub>O

| parameter |    |                 | bond angle (°) | parameter |    |                 | bond angle (°) |
|-----------|----|-----------------|----------------|-----------|----|-----------------|----------------|
| H2A       | O2 | H2B             | 109.5          | N7        | N6 | C3              | 108.9(2)       |
| C2        | N2 | N1              | 132.49(19)     | N2        | N1 | H1A             | 110.1          |
| C1        | N2 | N1              | 121.26(19)     | N2        | N1 | H1B             | 109.1          |
| C1        | N2 | C2              | 106.2(2)       | H1A       | N1 | H1B             | 109            |
| N3        | N4 | H4              | 124.2          | N8        | N7 | N6              | 105.9(2)       |
| C1        | N4 | H4              | 124.2          | N7        | N8 | N9              | 111.3(2)       |
| C1        | N4 | N3              | 111.61(19)     | N2        | C2 | C2 <sup>1</sup> | 123.9(3)       |
| H5A       | N5 | H5B             | 120            | N3        | C2 | N2              | 111.55(19)     |
| C1        | N5 | H5A             | 120            | N3        | C2 | C2 <sup>1</sup> | 124.6(3)       |
| C1        | N5 | H5B             | 120            | N4        | C1 | N2              | 106.2(2)       |
| C3        | N9 | N8              | 105.9(2)       | N5        | C1 | N2              | 124.9(2)       |
| C2        | N3 | N4              | 104.39(19)     | N5        | C1 | N4              | 128.9(2)       |
| O1        | N6 | N7              | 122.1(2)       | N9        | C3 | N6              | 108.0(2)       |
| O1        | N6 | C3              | 129.0(2)       | N9        | C3 | C3 <sup>2</sup> | 127.2(3)       |
| N6        | C3 | C3 <sup>2</sup> | 124.8(3)       |           |    |                 |                |

<sup>1</sup>-X,1-Y,-Z; <sup>2</sup>1-X,1-Y,1-ZTable S4. Selected torsion angles for 3·2H<sub>2</sub>O

| parameter |    |    |    | torsion angle (°) | parameter |    |    |    | torsion angle (°) |
|-----------|----|----|----|-------------------|-----------|----|----|----|-------------------|
| O1        | N6 | N7 | N8 | 178.9(2)          | N7        | N6 | C3 | N9 | 0.3(3)            |
| O1        | N6 | C3 | N9 | -178.9(2)         | N7        | N6 | C3 | C3 | 178.4(3)          |
| O1        | N6 | C3 | C3 | -0.8(5)           | N8        | N9 | C3 | N6 | -0.1(3)           |
| N4        | N3 | C2 | N2 | -0.4(3)           | N8        | N9 | C3 | C3 | -178.2(3)         |
| N4        | N3 | C2 | C2 | 179.2(3)          | C2        | N2 | C1 | N4 | -1.7(3)           |
| N3        | N4 | C1 | N2 | 1.5(3)            | C2        | N2 | C1 | N5 | 178.0(2)          |
| N3        | N4 | C1 | N5 | -178.2(2)         | C1        | N2 | C2 | N3 | 1.4(3)            |
| N6        | N7 | N8 | N9 | 0.4(3)            | C1        | N2 | C2 | C2 | -178.3(3)         |
| N1        | N2 | C2 | N3 | 178.7(2)          | C1        | N4 | N3 | C2 | -0.7(3)           |
| N1        | N2 | C2 | C2 | -1.0(5)           | C3        | N9 | N8 | N7 | -0.2(3)           |
| N1        | N2 | C1 | N4 | -179.4(2)         | C3        | N6 | N7 | N8 | -0.4(3)           |
| N1        | N2 | C1 | N5 | 0.3(4)            |           |    |    |    |                   |

<sup>1</sup>1-X,1-Y,1-Z; <sup>2</sup>-X,1-Y,-ZTable S5. Hydrogen bonds for 3·2H<sub>2</sub>O

| Donor--H...Acceptor | D-H (Å) | H...A (Å) | D...A (Å) | D-H...A (°) |
|---------------------|---------|-----------|-----------|-------------|
| N(1) --H(1A) ..N(7) | 0.86    | 2.54      | 3.327(3)  | 151         |
| N(1) --H(1B) ..N(5) | 0.86    | 2.43      | 2.842(3)  | 110         |
| N(1) --H(1B) ..O(1) | 0.86    | 2.49      | 3.335(3)  | 167         |
| O(2) --H(2A) ..O(1) | 0.85    | 1.92      | 2.746(3)  | 163         |
| O(2) --H(2A) ..N(6) | 0.85    | 2.57      | 3.208(3)  | 133         |
| O(2) --H(2B) ..N(9) | 0.85    | 2.06      | 2.853(3)  | 155         |
| N(4) --H(4) ..O(2)  | 0.87    | 1.76      | 2.593(3)  | 160         |
| N(5) --H(5A) ..N(8) | 0.87    | 2.09      | 2.928(4)  | 162         |
| N(5) --H(5B) ..N(1) | 0.87    | 2.56      | 2.842(3)  | 100         |
| N(5) --H(5B) ..O(1) | 0.87    | 2.08      | 2.935(3)  | 168         |

## 2. Single-crystal X-ray diffraction analysis of **4**

Table S6. Crystal data and structure refinement for **4**

| <b>4</b>                                                     |                                                                              |
|--------------------------------------------------------------|------------------------------------------------------------------------------|
| CCDC                                                         | 1903599                                                                      |
| Empirical formula                                            | C <sub>8</sub> H <sub>12</sub> N <sub>26</sub> O <sub>4</sub>                |
| Formula weight                                               | 536.44                                                                       |
| Temperature / K                                              | 205                                                                          |
| Crystal system                                               | triclinic                                                                    |
| Space group                                                  | P-1                                                                          |
| <i>a</i> / Å                                                 | 6.4179(5)                                                                    |
| <i>b</i> / Å                                                 | 7.4575(5)                                                                    |
| <i>c</i> / Å                                                 | 10.8598(8)                                                                   |
| $\alpha$ / °                                                 | 74.881(5)                                                                    |
| $\beta$ / °                                                  | 74.297(5)                                                                    |
| $\gamma$ / °                                                 | 88.026(6)                                                                    |
| Volume / Å <sup>3</sup>                                      | 482.68(6)                                                                    |
| <i>Z</i>                                                     | 1                                                                            |
| $\rho_{\text{calc}}$ / g cm <sup>-3</sup>                    | 1.845                                                                        |
| $\mu$ / mm <sup>-1</sup>                                     | 0.153                                                                        |
| <i>F</i> (000)                                               | 274.0                                                                        |
| Crystal size / mm <sup>3</sup>                               | 0.18×0.12×0.11                                                               |
| Radiation                                                    | MoK $\alpha$ ( $\lambda$ = 0.71073)                                          |
| 2 $\theta$ range for data collection/°                       | 4.036 to 55.594                                                              |
| Index ranges                                                 | -8 ≤ <i>h</i> ≤ 8, -9 ≤ <i>k</i> ≤ 9, -14 ≤ <i>l</i> ≤ 13                    |
| Reflections collected                                        | 8188                                                                         |
| Independent reflections                                      | 2264 [ <i>R</i> <sub>int</sub> = 0.0932, <i>R</i> <sub>sigma</sub> = 0.0715] |
| Data / restraints / parameters                               | 2264 / 2 / 177                                                               |
| Goodness-of-fit on <i>F</i> <sup>2</sup>                     | 1.009                                                                        |
| Final <i>R</i> indexes [ <i>I</i> ≥ 2 $\sigma$ ( <i>I</i> )] | <i>R</i> <sub>1</sub> = 0.0579, <i>wR</i> <sub>2</sub> = 0.1584              |
| Final <i>R</i> indexes [all data]                            | <i>R</i> <sub>1</sub> = 0.0902, <i>wR</i> <sub>2</sub> = 0.1748              |
| Largest diff. peak / hole / e Å <sup>-3</sup>                | 0.65 / -0.65                                                                 |

Table S7. Selected bond lengths for **4**

| parameter | bond length (Å) | parameter              | bond length (Å) |
|-----------|-----------------|------------------------|-----------------|
| O1 N2AA   | 1.328(3)        | N4AA N5                | 1.342(3)        |
| O1 H1     | 0.87(2)         | N4AA C6                | 1.333(3)        |
| N2 N3     | 1.299(3)        | N2AA C7                | 1.343(3)        |
| N2 N2AA   | 1.332(3)        | N6 C7                  | 1.329(3)        |
| N3 N6     | 1.357(3)        | N1 H1A                 | 0.87            |
| O4 N4AA   | 1.317(3)        | N1 H1B                 | 0.87            |
| N3AA C0AA | 1.348(3)        | N1 C0AA                | 1.322(3)        |
| N3AA C1AA | 1.379(3)        | C1AA C1AA <sup>1</sup> | 1.459(5)        |
| N3AA N4   | 1.388(3)        | N4 H4A                 | 0.8637          |
| N0AA N1AA | 1.376(3)        | N4 H4B                 | 0.8637          |
| N0AA C1AA | 1.294(3)        | N5 N8                  | 1.295(3)        |
| N1AA H1AA | 0.87            | C6 C7                  | 1.442(4)        |

|      |      |          |    |    |          |
|------|------|----------|----|----|----------|
| N1AA | C0AA | 1.334(4) | C6 | N9 | 1.342(3) |
| N8   | N9   | 1.347(3) |    |    |          |

<sup>1</sup>-X,2-Y,2-Z

Table S8. Selected bond angles for **4**

| parameter |      |      | bond angle (°) | parameter |      |                   | bond angle (°) |
|-----------|------|------|----------------|-----------|------|-------------------|----------------|
| N2AA      | O1   | H1   | 98(4)          | H1A       | N1   | H1B               | 120            |
| N3        | N2   | N2AA | 106.3(2)       | C0AA      | N1   | H1A               | 120            |
| N2        | N3   | N6   | 111.0(2)       | C0AA      | N1   | H1B               | 120            |
| C0AA      | N3AA | C1AA | 106.2(2)       | N1AA      | C0AA | N3AA              | 106.5(2)       |
| C0AA      | N3AA | N4   | 121.0(2)       | N1        | C0AA | N3AA              | 123.3(3)       |
| C1AA      | N3AA | N4   | 132.4(2)       | N1        | C0AA | N1AA              | 130.1(3)       |
| C1AA      | N0AA | N1AA | 104.6(2)       | N3AA      | C1AA | C1AA <sup>1</sup> | 123.4(3)       |
| N0AA      | N1AA | H1AA | 124.5          | N0AA      | C1AA | N3AA              | 111.6(2)       |
| C0AA      | N1AA | N0AA | 111.0(2)       | N0AA      | C1AA | C1AA <sup>1</sup> | 125.0(3)       |
| C0AA      | N1AA | H1AA | 124.5          | N3AA      | N4   | H4A               | 109.1          |
| O4        | N4AA | N5   | 122.6(2)       | N3AA      | N4   | H4B               | 110.3          |
| O4        | N4AA | C6   | 128.6(2)       | H4A       | N4   | H4B               | 108.8          |
| C6        | N4AA | N5   | 108.8(2)       | N8        | N5   | N4AA              | 106.4(2)       |
| O1        | N2AA | N2   | 123.5(2)       | N4AA      | C6   | C7                | 124.5(2)       |
| O1        | N2AA | C7   | 127.1(2)       | N4AA      | C6   | N9                | 108.2(2)       |
| N2        | N2AA | C7   | 109.4(2)       | N9        | C6   | C7                | 127.3(2)       |
| C7        | N6   | N3   | 105.7(2)       | N2AA      | C7   | C6                | 125.6(2)       |
| N5        | N8   | N9   | 111.4(2)       | N6        | C7   | N2AA              | 107.6(2)       |
| C6        | N9   | N8   | 105.3(2)       | N6        | C7   | C6                | 126.8(2)       |

<sup>1</sup>-X,2-Y,2-Z

Table S9. Selected torsion angles for **4**

| parameter                        |  | torsion angle (°) | parameter                        |  | torsion angle (°) |
|----------------------------------|--|-------------------|----------------------------------|--|-------------------|
| O1-N2AA-C7-N6                    |  | -179.3(2)         | C0AA-N3AA-C1AA-N0AA              |  | -0.9(3)           |
| O1-N2AA-C7-C6                    |  | 1.4(4)            | C0AA-N3AA-C1AA-C1AA              |  | 177.8(3)          |
| N2-N3-N6-C7                      |  | 1.0(3)            | C1AA-N3AA-C0AA-N1AA <sup>1</sup> |  | 1.1(3)            |
| N2-N2AA-C7-N6                    |  | 0.5(3)            | C1AA-N3AA-C0AA-N1                |  | 178.5(2)          |
| N2-N2AA-C7-C6                    |  | -178.8(2)         | C1AA-N0AA-N1AA-C0AA              |  | 0.4(3)            |
| N3-N2-N2AA-O1                    |  | 179.9(2)          | N4-N3AA-C0AA-N1AA                |  | 175.0(2)          |
| N3-N2-N2AA-C7                    |  | 0.1(3)            | N4-N3AA-C0AA-N1                  |  | -7.5(4)           |
| N3-N6-C7-N2AA                    |  | -0.9(3)           | N4-N3AA-C1AA-N0AA                |  | -173.8(2)         |
| N3-N6-C7-C6                      |  | 178.5(2)          | N4-N3AA-C1AA-C1AA <sup>1</sup>   |  | 4.9(5)            |
| O4-N4AA-N5-N8                    |  | 179.4(2)          | N5-N4AA-C6-C7                    |  | -177.3(2)         |
| O4-N4AA-C6-C7                    |  | 2.5(4)            | N5-N4AA-C6-N9                    |  | 0.5(3)            |
| O4-N4AA-C6-N9                    |  | -179.7(2)         | N5-N8-N9-C6                      |  | -0.4(3)           |
| N0AA-N1AA-C0AA-N3AA              |  | -0.9(3)           | C6-N4AA-N5-N8                    |  | -0.7(3)           |
| N0AA-N1AA-C0AA-N1                |  | -178.2(3)         | C7-C6-N9-N8                      |  | 177.7(3)          |
| N1AA-N0AA-C1AA-N3AA              |  | 0.3(3)            | N9-C6-C7-N2AA                    |  | 1.4(4)            |
| N1AA-N0AA-C1AA-C1AA <sup>1</sup> |  | -178.4(3)         | N9-C6-C7-N6                      |  | -177.8(3)         |
| N4AA-N5-N8-N9                    |  | 0.7(3)            | N4AA-C6-N9-N8                    |  | -0.1(3)           |
| N4AA-C6-C7-N2AA                  |  | 178.8(2)          | N2AA-N2-N3-N6                    |  | -0.7(3)           |
| N4AA-C6-C7-N6                    |  | -0.4(4)           |                                  |  |                   |

<sup>1</sup>-X,2-Y,2-Z

Table S10. Hydrogen bonds for 4

| Donor--H...Acceptor | D-H (Å) | H...A (Å) | D...A (Å) | D-H...A (°) |
|---------------------|---------|-----------|-----------|-------------|
| O1 --H1 ..O4        | 0.87(4) | 1.64(3)   | 2.479(3)  | 162(5)      |
| O1 --H1 ..N4AA      | 0.87(4) | 2.48(3)   | 3.150(3)  | 135(4)      |
| N1AA --H1AA ..N9    | 0.87    | 2.11      | 2.919(3)  | 156         |
| N1 --H1A ..N6       | 0.87    | 2.19      | 2.926(3)  | 142         |
| N1 --H1B ..N4       | 0.87    | 2.5       | 2.793(3)  | 100         |
| N1 --H1B ..N9       | 0.87    | 2.38      | 3.209(4)  | 159         |
| N4 --H4A ..O1       | 0.86    | 2.54      | 3.399(3)  | 173         |
| N4 --H4B ..N8       | 0.86    | 2.46      | 3.000(3)  | 121         |

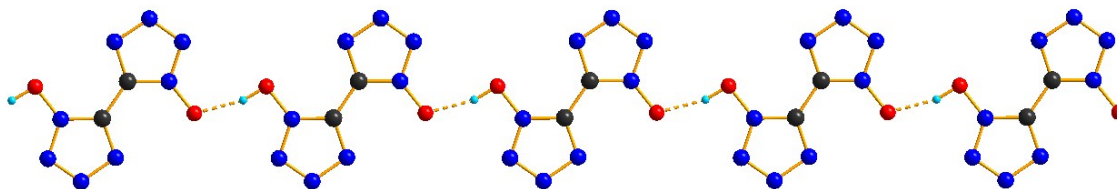

**Fig. S1** The long chain of HBTO<sup>-</sup> anions along the *b* axis by formation of very strong hydrogen bonds O1-H1...O4.

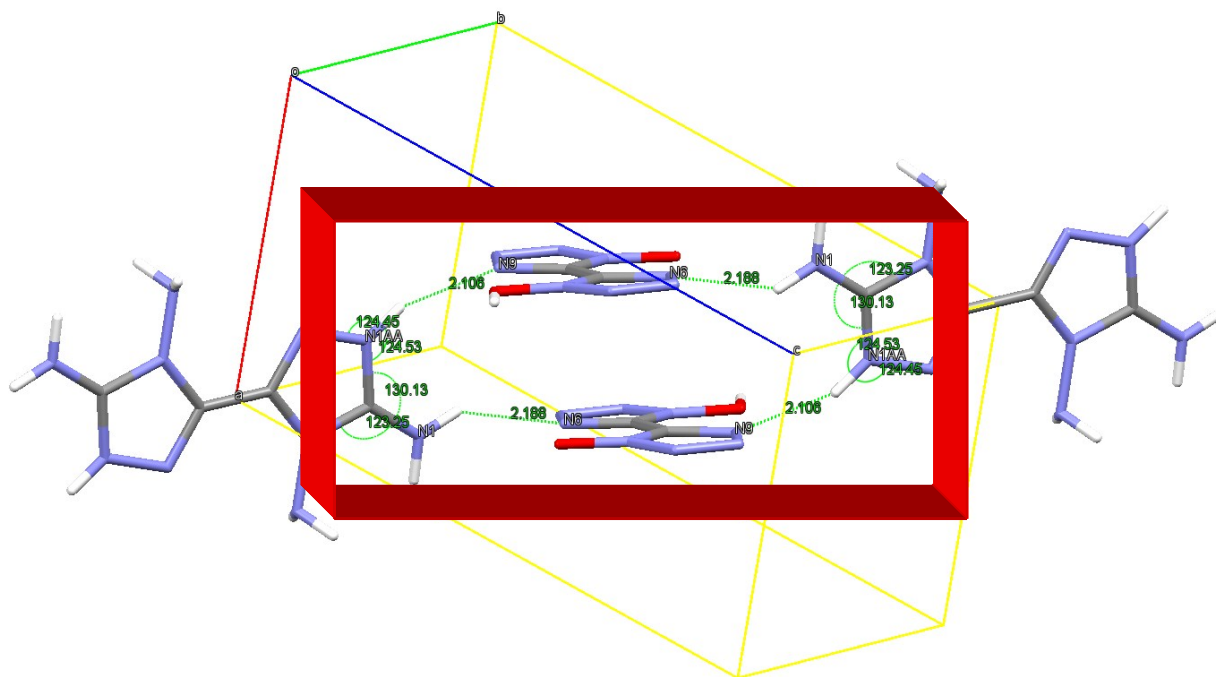

**Fig. S2** The anions of the adjacent layers are fixed in a rectangular (in red) by hydrogen bonds with the cations.

### 3. Calculation of heats of formation

For energetic salts, the solid-phase heats of formation are calculated on the basis of a Born-Haber energy cycle (Scheme S1).

Based on a Born-Haber energy cycle, the heat of formation of a salt can be simplified by the formula given in Equation (1):

$$\Delta H_f^\circ (\text{salt}, 298 \text{ K}) = \Delta H_f^\circ (\text{cation}, 298\text{K}) + \Delta H_f^\circ (\text{anion}, 298\text{K}) - \Delta H_L \quad (1)$$

where  $\Delta H_L$  is the lattice energy of the salts, which could be predicted by using the formula suggested by Jenkins et al.<sup>2</sup> [Eq. (2)]

$$\Delta H_L = U_{\text{POT}} + [p(n_M/2 - 2) + q(n_X/2 - 2)]RT \quad (2)$$

where  $n_M$  and  $n_X$  depend on the nature of the ions,  $M_p^+$  and  $X_q^-$ , and are equal to 3 for monatomic ions, 5 for linear polyatomic ions, and 6 for nonlinear polyatomic ions.

The equation for lattice potential energy  $U_{\text{POT}}$  [Eq. (3)] has the form:

$$U_{\text{POT}} [\text{kJ mol}^{-1}] = \gamma(\rho_m/M_m)^{1/3} + \delta \quad (3)$$

Where  $\rho_m/\text{g cm}^{-3}$  is the density,  $M_m$  is the chemical formula mass of the ionic material, and values for the coefficients  $\gamma/\text{kJ mol}^{-1} \text{ cm}$  and  $\delta/\text{kJ mol}^{-1}$  are taken from the literature<sup>3</sup>.

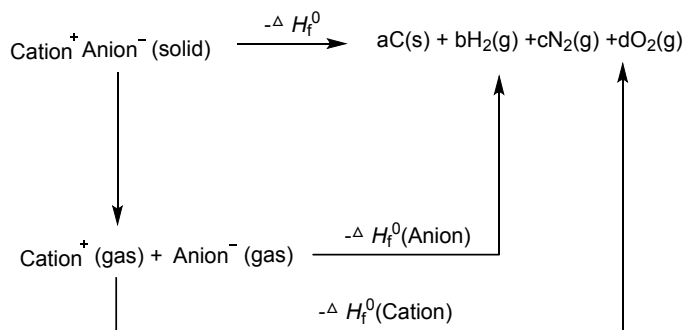

Scheme S1. Born-Haber cycle for the formation of energetic salts

### References

- 1 E. R. Johnson and S. Keinan, *J. Am. Chem. Soc.*, 2010, **132**, 6498-6506.
- 2 H. D. B. Jenkins, D. Tudela and L. Glasser, *Inorg. Chem.*, 2002, **41**, 2364-2367.
- 3 H. D. B. Jenkins, H. K. Roobottom, J. Passmore and L. Glasser, *Inorg. Chem.*, 1999, **38**, 3609-3620.
